# Supplementary material for: Synthesis of azole-functionalized microspheres and their adsorption properties for gold(i) thiosulfate complex
Source: Royal Society of Chemistry journal article supplement (doi:10.1039/d3dt00536d), 2023-01-01
Supplement: d3dt00536d1.pdf [file d3dt00536d1.pdf]

Supporting Information for

**Synthesis of azole-functionalized microspheres and its adsorption properties for gold(I) thiosulfate complex**

*Li Zhao<sup>a</sup>, Shuliang Chen<sup>c</sup>, Xianzhi Hu<sup>b, \*</sup>, Futing Zi<sup>b, \*</sup>*

<sup>a</sup> Faculty of Land Resource Engineering, Kunming University of Science and Technology, Kunming 650093, China

<sup>b</sup> Faculty of Science, Kunming University of Science and Technology, Kunming 650500, China

<sup>c</sup> Faculty of Metallurgical and Energy Engineering, Kunming University of Science and Technology, Kunming 650093, China

\* Corresponding author:

Xianzhi Hu - E-mail: [xianzhihu2@sina.com](mailto:xianzhihu2@sina.com); Tel.: +8613508808699; ORCID: 0000-0003-2558-5693

Futing Zi - E-mail: [345992103@qq.com](mailto:345992103@qq.com); Tel.: +8613987183370; ORCID: 0000-0003-1333-5734

Content of supplementary: 1

Number of pages: 3

Number of tables: 8

## CONTENT

|                                                                                                                                                        |    |
|--------------------------------------------------------------------------------------------------------------------------------------------------------|----|
| 1. Pre-processing steps of gold-containing samples.....                                                                                                | 4  |
| Table S1. $R_d$ values of different initial gold concentration. ....                                                                                   | 5  |
| Fig. S1. Gold adsorption capacity of PS-3-AT for Au( I ) in different initial gold concentrations. ....                                                | 6  |
| Table S2. Residual Au( I ) concentration in solution after PS-3-AT adsorption for $Au(S_2O_3)_2^{3-}$ under different initial gold concentration. .... | 7  |
| Table S3. Linear fitting parameters of the adsorption kinetics of PS-3-AT.....                                                                         | 8  |
| Table S4. $R_d$ values of different thiosulfate concentration.....                                                                                     | 9  |
| Table S5. Residual Au( I ) concentration in solution after PS-3-AT adsorption for $Au(S_2O_3)_2^{3-}$ under different thiosulfate concentration.....   | 10 |
| Fig. S2. Gold adsorption capacity of PS-3-AT for Au( I ) in different thiosulfate concentration.....                                                   | 11 |
| Table S6. $R_d$ values of different temperature. ....                                                                                                  | 12 |
| Table S7. Residual Au( I ) concentration in solution after PS-3-AT adsorption for $Au(S_2O_3)_2^{3-}$ under different temperature. ....                | 13 |
| Fig. S3. Gold adsorption capacity of PS-3-AT for Au( I ) in different temperature. ....                                                                | 14 |
| Fig. S4. Comparison of adsorption ability of PS-3-AT with other resins. ....                                                                           | 15 |
| Fig. S5. Comparison of hardness of PS-3-AT with other resins.....                                                                                      | 16 |
| Table S8. Comparison of the price of PS-3-AT with other resins.....                                                                                    | 17 |

### **1. Pre-processing steps of gold-containing samples.**

Before testing, the residual solution containing gold after adsorption need some pretreatment process, which are as follows.

- (a) Taking two 3 mL parallel solution after adsorption, and add appropriate amount of deionized water to dilute;
- (b) Then 3 mL  $\text{H}_2\text{O}_2$  with 30% concentration is added drop by drop, oxidizing for 30 min;
- (c) After oxidation, 2 mL hydrochloric acid with a volume ratio of 1:3 (v/v) was added;
- (d) Put the oxidized solution on the electric heating plate and heat it until it is nearly dry, during the heating process, add 2 drops of 10% KCl solution;
- (e) Finally, dissolving with 5% aqua regia and fill in a 25 mL volumetric bottle, AAS were used to analyze the concentration of gold.

**Table S1.  $R_d$  values of different initial gold concentration.**

|             |      | Initial gold Concentration (mg/L) |           |            |             |
|-------------|------|-----------------------------------|-----------|------------|-------------|
|             |      | 20                                | 30        | 40         | 50          |
| $R_d$ (L/g) | 2 h  | 1.01±0.03                         | 0.48±0.02 | 0.19±0.005 | 0.004±0.002 |
|             | 4 h  | 1.62±0.03                         | 1.01±0.03 | 0.54±0.006 | 0.14±0.002  |
|             | 6 h  | 2.33±0.08                         | 1.50±0.06 | 0.93±0.01  | 0.26±0.003  |
|             | 8 h  | 3.46±0.29                         | 2.26±0.09 | 1.47±0.04  | 0.66±0.01   |
|             | 10 h | 4.62±0.31                         | 3.50±0.19 | 2.14±0.02  | 0.88±0.01   |
|             | 12 h | 7.03±0.53                         | 4.65±0.24 | 2.50±0.03  | 0.99±0.005  |
|             | 24 h | 43.03±0                           | 8.8±0.77  | 2.98±0.04  | 1.22±0.02   |
|             | 36 h | -                                 | 8.9±0.64  | 3.24±0.05  | 1.23±0.01   |
|             | 48 h | -                                 | 8.93±0.87 | 3.26±0.02  | 1.23±0      |
|             | 60 h | -                                 | 8.93±0.15 | 3.27±0.06  | 1.23±0.001  |
|             | 72 h | -                                 | 8.93±2.03 | 3.27±0     | 1.23±0      |
|             | 84 h | -                                 | 8.93±0.74 | 3.27±0     | 1.23±0      |

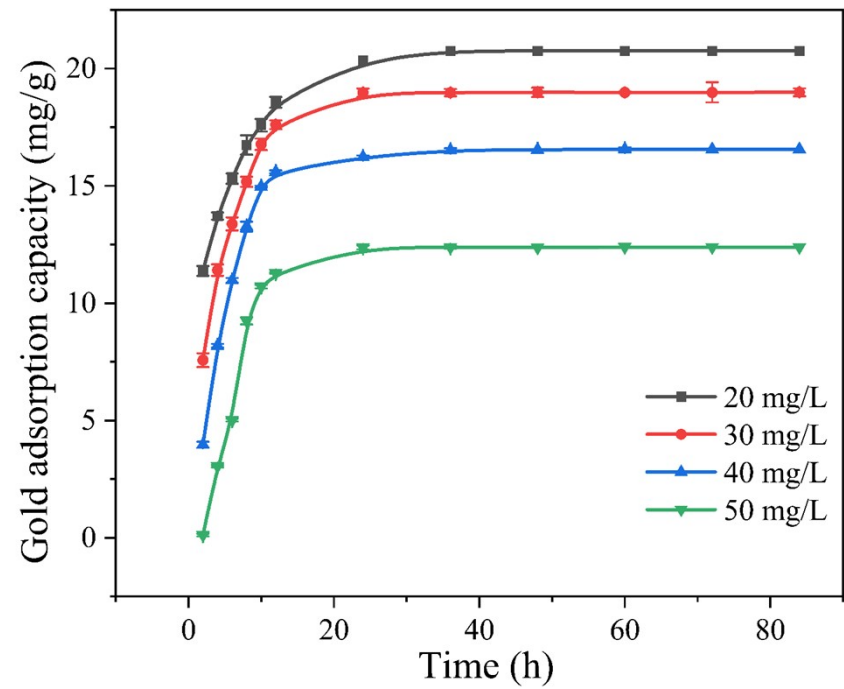

**Fig. S1. Gold adsorption capacity of PS-3-AT for Au( I ) in different initial gold concentrations.**  
( $m_{\text{PS-3-AT}}=0.2 \text{ g}$ ,  $c_{\text{S}_2\text{O}_3^{2-}}=0.01 \text{ mol/L}$ ,  $\text{pH}=9$ )

**Table S2. Residual Au( I ) concentration in solution after PS-3-AT adsorption for Au(S<sub>2</sub>O<sub>3</sub>)<sub>2</sub><sup>3-</sup> under different initial gold concentration.**

| Initial gold Concentration (mg/L) | Residual Au( I ) concentration(mg/L) |       |       |       |       |       |       |       |       |       |       |       |
|-----------------------------------|--------------------------------------|-------|-------|-------|-------|-------|-------|-------|-------|-------|-------|-------|
|                                   | 2 h                                  | 4 h   | 6 h   | 8 h   | 10 h  | 12 h  | 24 h  | 36 h  | 48 h  | 60 h  | 72 h  | 84 h  |
| 20                                | 1.382                                | 1.005 | 0.767 | 0.624 | 0.487 | 0.294 | 0.057 | 0     | 0     | 0     | 0     | 0     |
|                                   | 1.339                                | 1.037 | 0.812 | 0.539 | 0.431 | 0.314 | 0.057 | 0     | 0     | 0     | 0     | 0     |
| 30                                | 1.883                                | 1.381 | 1.098 | 0.787 | 0.602 | 0.437 | 0.276 | 0.273 | 0.235 | 0.26  | 0.212 | 0.273 |
|                                   | 1.943                                | 1.331 | 1.041 | 0.831 | 0.552 | 0.475 | 0.239 | 0.241 | 0.276 | 0.252 | 0.3   | 0.238 |
| 40                                | 2.449                                | 1.815 | 1.429 | 1.065 | 0.835 | 0.755 | 0.649 | 0.605 | 0.614 | 0.6   | 0.609 | 0.609 |
|                                   | 2.423                                | 1.831 | 1.409 | 1.108 | 0.844 | 0.742 | 0.662 | 0.622 | 0.608 | 0.617 | 0.609 | 0.609 |
| 50                                | 2.989                                | 2.564 | 2.29  | 1.654 | 1.466 | 1.370 | 1.207 | 1.221 | 1.216 | 1.213 | 1.213 | 1.213 |
|                                   | 3.001                                | 2.574 | 2.278 | 1.685 | 1.45  | 1.377 | 1.224 | 1.208 | 1.216 | 1.212 | 1.213 | 1.213 |

**Table S3. Linear fitting parameters of the adsorption kinetics of PS-3-AT.**

| Model              | Parameters                                    | Concentration (mg/L) |                     |                     |                     |
|--------------------|-----------------------------------------------|----------------------|---------------------|---------------------|---------------------|
|                    |                                               | 20                   | 30                  | 40                  | 50                  |
| Weber-Morris model | First Stage                                   | $y=1.5438x+10.3152$  | $y=2.2175x+6.2094$  | $y=2.706x+2.1538$   | $y=2.7356x-2.5809$  |
|                    | Second Stage                                  | $y=0.2996x+16.7612$  | $y=0.2273x+16.2445$ | $y=0.1068x+14.9495$ | $y=0.1814x+10.1961$ |
|                    | Third Stage                                   | $y=20.75$            | $y=0.0197x+18.9781$ | $y=0.0011x+16.5112$ | $y=0.1405x+12.2709$ |
|                    | $k_1$ (mg g <sup>-1</sup> h <sup>-1/2</sup> ) | 1.5438               | 2.2175              | 2.706               | 2.7356              |
|                    | $k_2$ (mg g <sup>-1</sup> h <sup>-1/2</sup> ) | 0.2996               | 0.2273              | 0.1068              | 0.1814              |
|                    | $k_3$ (mg g <sup>-1</sup> h <sup>-1/2</sup> ) | 0                    | 0.0197              | 0.0011              | 0.1405              |



**Table S4. R<sub>d</sub> values of different thiosulfate concentration.**

|                      |      | Initial gold Concentration (mg/L) |           |            |            |             |            |
|----------------------|------|-----------------------------------|-----------|------------|------------|-------------|------------|
|                      |      | 0.01                              | 0.05      | 0.1        | 0.15       | 0.2         | 0.25       |
| R <sub>d</sub> (L/g) | 2 h  | 1.04±0.02                         | 0.82±0.04 | 0.50±0.004 | 0.33±0.009 | 0.31±0.007  | 0.25±0.01  |
|                      | 4 h  | 1.96±0.23                         | 1.08±0.07 | 0.70±0.04  | 0.45±0.004 | 0.37±0.003  | 0.31±0.008 |
|                      | 6 h  | 3.45±0.03                         | 1.42±0.11 | 0.85±0.08  | 0.54±0.04  | 0.46±0.001  | 0.41±0.006 |
|                      | 8 h  | 7.94±0.12                         | 1.66±0.02 | 1.21±0.02  | 0.78±0.04  | 0.52±0.1    | 0.45±0.002 |
|                      | 10 h | 24.81±5.79                        | 2.42±0.09 | 1.58±0.09  | 1.03±0.01  | 0.59±0.007  | 0.54±0.02  |
|                      | 12 h | -                                 | 3.36±0.13 | 2.1±0      | 1.22±0.04  | 0.69±0.005  | 0.62±0.004 |
|                      | 24 h | -                                 | 6.84±1.67 | 2.65±0.08  | 1.40±0.02  | 0.88±0.001  | 0.77±0.01  |
|                      | 36 h | -                                 | 6.86±0.09 | 2.65±0.09  | 1.42±0.003 | 0.88±0.001  | 0.77±0.003 |
|                      | 48 h | -                                 | 6.86±0.07 | 2.65±0.07  | 1.42±0.001 | 0.88±0.0006 | 0.77±0.004 |
|                      | 60 h | -                                 | 6.86±0    | 2.65±0.09  | 1.43±0.003 | 0.88±0.0006 | 0.77±0.004 |
|                      | 72 h | -                                 | 6.86±0    | 2.65±0.09  | 1.42±0     | 0.88±0.0005 | 0.77±0.003 |

**Table S5. Residual Au( I ) concentration in solution after PS-3-AT adsorption for Au(S<sub>2</sub>O<sub>3</sub>)<sub>2</sub><sup>3-</sup> under different thiosulfate concentration.**

| Thiosulfate Concentration (mg/L) | Residual Au( I ) concentration(mg/L) |       |       |       |       |       |       |       |       |       |       |
|----------------------------------|--------------------------------------|-------|-------|-------|-------|-------|-------|-------|-------|-------|-------|
|                                  | 2 h                                  | 4 h   | 6 h   | 8 h   | 10 h  | 12 h  | 24 h  | 36 h  | 48 h  | 60 h  | 72 h  |
| 0.01                             | 1.352                                | 0.975 | 0.579 | 0.289 | 0.069 | 0     | 0     | 0     | 0     | 0     | 0     |
|                                  | 1.323                                | 0.814 | 0.589 | 0.281 | 0.071 | 0     | 0     | 0     | 0     | 0     | 0     |
| 0.05                             | 1.549                                | 1.259 | 1.164 | 0.991 | 0.791 | 0.577 | 0.417 | 0.329 | 0.322 | 0.325 | 0.325 |
|                                  | 1.472                                | 1.364 | 1.054 | 1.011 | 0.744 | 0.616 | 0.235 | 0.321 | 0.328 | 0.325 | 0.325 |
| 0.1                              | 1.883                                | 1.591 | 1.561 | 1.21  | 0.994 | 0.845 | 0.701 | 0.735 | 0.697 | 0.735 | 0.698 |
|                                  | 1.872                                | 1.67  | 1.422 | 1.234 | 1.074 | 0.842 | 0.734 | 0.698 | 0.736 | 0.698 | 0.735 |
| 0.15                             | 2.128                                | 1.947 | 1.768 | 1.589 | 1.331 | 1.238 | 1.106 | 1.109 | 1.107 | 1.106 | 1.107 |
|                                  | 2.161                                | 1.935 | 1.861 | 1.513 | 1.352 | 1.192 | 1.129 | 1.106 | 1.108 | 1.103 | 1.107 |
| 0.2                              | 2.182                                | 2.092 | 1.926 | 1.833 | 1.751 | 1.636 | 1.457 | 1.458 | 1.457 | 1.458 | 1.457 |
|                                  | 2.209                                | 2.081 | 1.921 | 1.867 | 1.768 | 1.648 | 1.459 | 1.456 | 1.459 | 1.457 | 1.458 |
| 0.25                             | 2.282                                | 2.196 | 2.022 | 1.945 | 1.785 | 1.710 | 1.548 | 1.563 | 1.556 | 1.563 | 1.557 |
|                                  | 2.332                                | 2.167 | 2.003 | 1.951 | 1.844 | 1.719 | 1.577 | 1.557 | 1.564 | 1.555 | 1.563 |

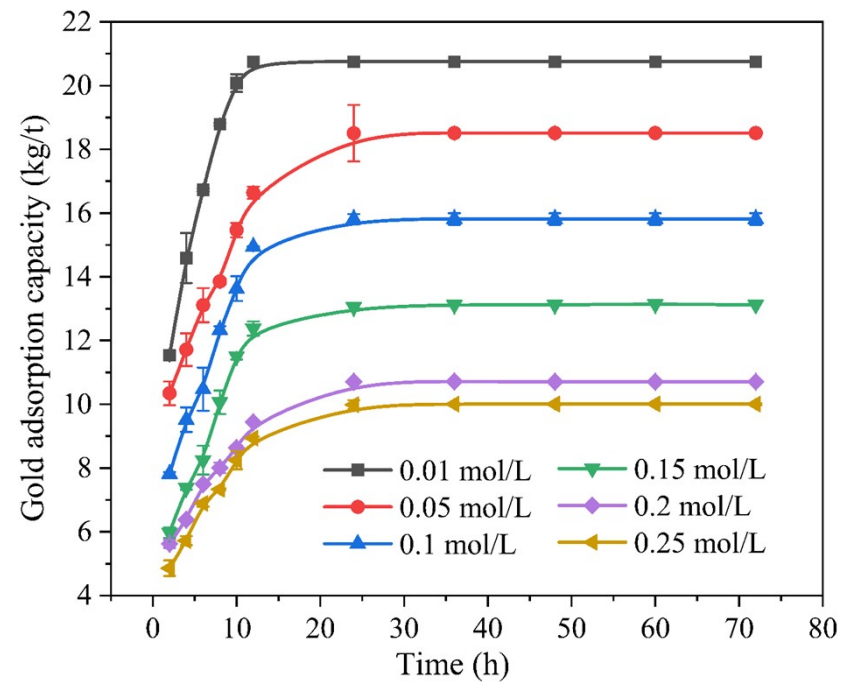

**Fig. S2. Gold adsorption capacity of PS-3-AT for Au( I ) in different thiosulfate concentration.**  
 ( $m_{\text{PS-3-AT}}=0.2 \text{ g}$ ,  $c_{\text{Au(I)}}=25 \text{ mg/L}$ ,  $\text{pH}=9$ )

**Table S6. R<sub>d</sub> values of different temperature.**

|                      |       | Temperature (K) |           |            |            |
|----------------------|-------|-----------------|-----------|------------|------------|
|                      |       | 308             | 318       | 328        | 338        |
| R <sub>d</sub> (L/g) | 0.5 h | 0.51±0.01       | 0.43±0.01 | 0.31±0.01  | 0.13±0.006 |
|                      | 1 h   | 1.37±0.03       | 0.93±0.02 | 0.58±0.015 | 0.25±0.006 |
|                      | 2 h   | 2.62±0.03       | 2.49±0.06 | 1.09±0.05  | 0.52±0.008 |
|                      | 4 h   | 5.94±0.24       | 4.40±0.34 | 1.74±0.04  | 0.81±0.013 |
|                      | 6 h   | 8.8±1.17        | 5.77±0.35 | 1.84±0.05  | 0.91±0.017 |
|                      | 8 h   | 51.25±11.1      | 6.19±0.39 | 1.89±0.06  | 1.01±0.039 |
|                      | 10 h  | -               | 6.25±0.36 | 1.91±0.04  | 1.07±0.017 |
|                      | 12 h  | -               | 6.27±0.33 | 1.92±0.06  | 1.06±0.017 |
|                      | 24 h  | -               | 6.29±0.29 | 1.94±0.003 | 1.08±0     |
|                      | 36 h  | -               | 6.31±0.25 | 1.94±0.05  | 1.08±0     |
|                      | 48 h  | -               | 6.31±0.21 | 1.95±0.06  | 1.08±0     |

**Table S7. Residual Au( I ) concentration in solution after PS-3-AT adsorption for Au(S<sub>2</sub>O<sub>3</sub>)<sub>2</sub><sup>3-</sup> under different temperature.**

| Temperature(K) | Residual Au( I ) concentration(mg/L) |       |       |       |       |       |       |       |       |       |       |
|----------------|--------------------------------------|-------|-------|-------|-------|-------|-------|-------|-------|-------|-------|
|                | 0.5 h                                | 1 h   | 2 h   | 4 h   | 6 h   | 8 h   | 10 h  | 12 h  | 24 h  | 36 h  | 48 h  |
| 308            | 1.848                                | 1.152 | 0.719 | 0.355 | 0.295 | 0.035 | 0     | 0     | 0     | 0     | 0     |
|                | 1.875                                | 1.119 | 0.732 | 0.383 | 0.222 | 0.061 | 0     | 0     | 0     | 0     | 0     |
| 318            | 1.999                                | 1.403 | 0.736 | 0.512 | 0.359 | 0.334 | 0.372 | 0.334 | 0.366 | 0.336 | 0.361 |
|                | 1.965                                | 1.440 | 0.766 | 0.443 | 0.400 | 0.377 | 0.333 | 0.369 | 0.336 | 0.363 | 0.339 |
| 328            | 2.214                                | 1.791 | 1.264 | 0.987 | 0.918 | 0.897 | 0.898 | 0.929 | 0.901 | 0.886 | 0.878 |
|                | 2.171                                | 1.751 | 1.338 | 0.953 | 0.955 | 0.940 | 0.928 | 0.891 | 0.901 | 0.921 | 0.917 |
| 338            | 2.578                                | 2.311 | 1.840 | 1.532 | 1.426 | 1.387 | 1.306 | 1.312 | 1.308 | 1.308 | 1.308 |
|                | 2.615                                | 2.285 | 1.861 | 1.507 | 1.453 | 1.331 | 1.331 | 1.336 | 1.308 | 1.308 | 1.308 |

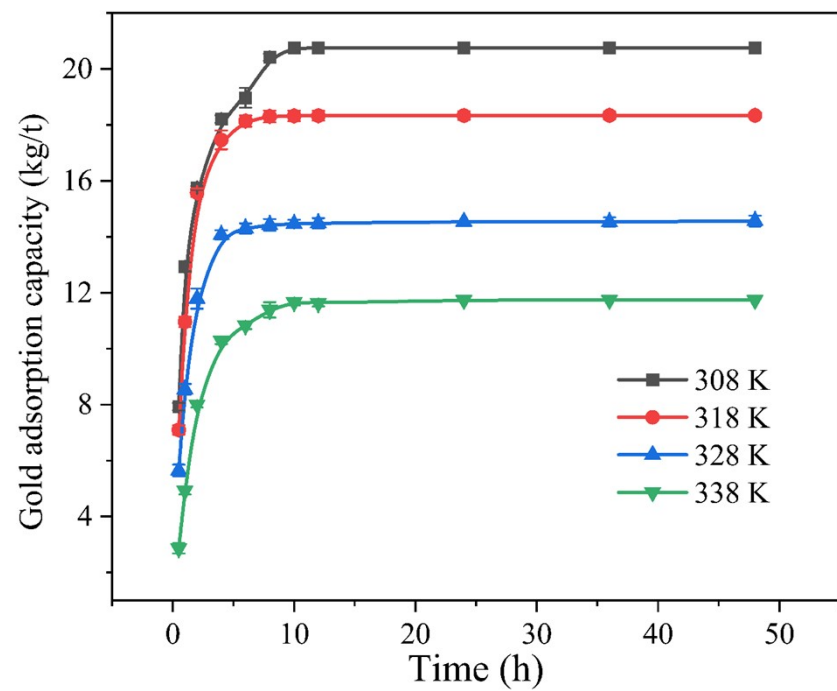

**Fig. S3. Gold adsorption capacity of PS-3-AT for Au( I ) in different temperature.**  
( $m_{\text{PS-3-AT}}=0.2 \text{ g}$ ,  $c_{\text{Au(I)}}=25 \text{ mg/L}$ ,  $c_{\text{S}_2\text{O}_3^{2-}}=0.01 \text{ mol/L}$ ,  $\text{pH}=9$ )

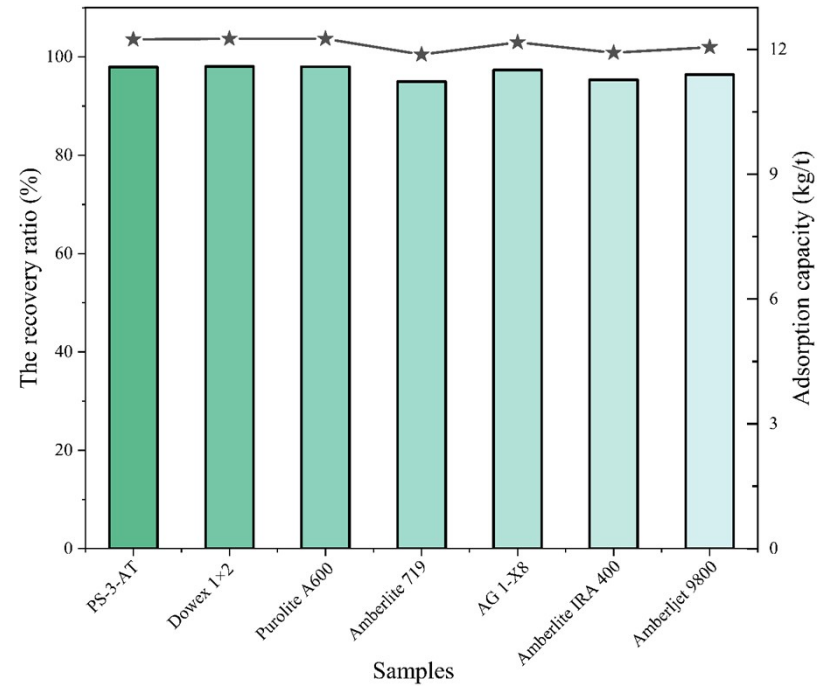

**Fig. S4. Comparison of adsorption ability of PS-3-AT with other resins.**  
 ( $m_{\text{adsorbent}}=0.2 \text{ g}$ ,  $c_{\text{S}_2\text{O}_3^{2-}}=0.01 \text{ mol/L}$ ,  $\text{pH}=9$ )

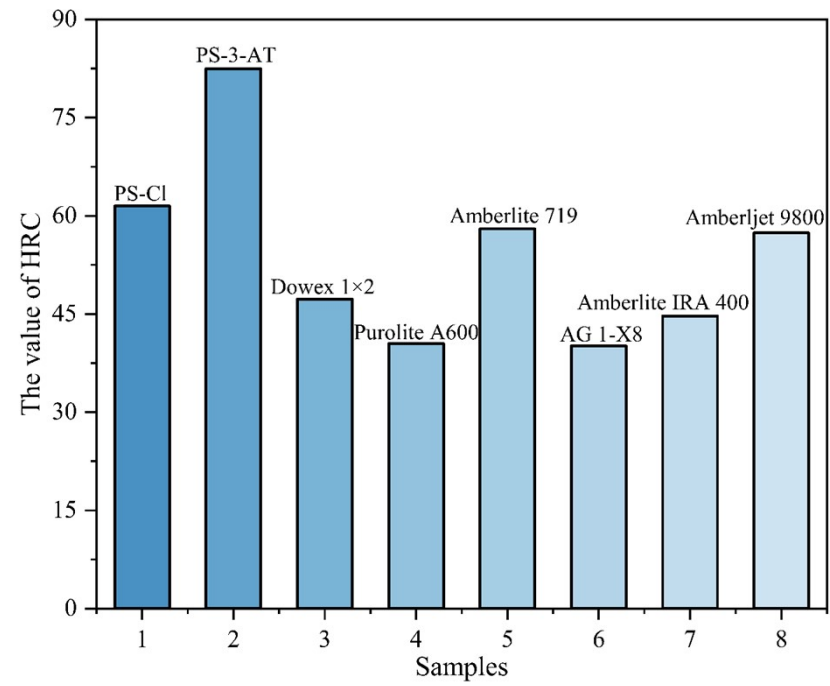

**Fig. S5. Comparison of hardness of PS-3-AT with other resins.**



**Table S8. Comparison of the price of PS-3-AT with other resins.**

| Samples           | Weight/g | Mesh      | Price/CNY |
|-------------------|----------|-----------|-----------|
| PS-Cl             | 100      | 12.5-37.5 | 18.5      |
| Dowex 1×2         | 100      | 100-200   | 1988      |
| Purolite A600     | 100      | 50-100    | 160       |
| Amberlite 719     | 100      | 50-100    | 180       |
| AG 1-X8           | 100      | 50-100    | 1060      |
| Amberlite IRA-400 | 100      | 50-100    | 200       |
| Amberjet 9800     | 100      | 50-100    | 300       |
